# Supplementary material for: The Role of p38 Mitogen-Activated Protein Kinase-Mediated F-Actin in the Acupuncture-Induced Mitigation of Inflammatory Pain in Arthritic Rats
Source: MDPI journal article supplement (doi:10.3390/brainsci14040380), 2024-04-14
Supplement: s1 [file s1]

Table S1

*Gradient pre-experiment for p38 MAPK inhibitor SB203580 injection dosage*

| Sample No. | Gene      | CT     | Mean CT | $\Delta$ CT | $2^{-\Delta\Delta CT}$ |
|------------|-----------|--------|---------|-------------|------------------------|
| normal     | rat p38   | 26.024 | 25.967  | 10.528      | 6.770E-04              |
|            | rat p38   | 25.971 |         |             |                        |
|            | rat p38   | 25.905 |         |             |                        |
|            | rat GAPDH | 15.481 | 15.438  |             |                        |
|            | rat GAPDH | 15.392 |         |             |                        |
|            | rat GAPDH | 15.441 |         |             |                        |
| 2.5        | rat p38   | 25.333 | 25.432  | 10.449      | 7.153E-04              |
|            | rat p38   | 25.423 |         |             |                        |
|            | rat p38   | 25.541 |         |             |                        |
|            | rat GAPDH | 15.004 | 14.983  |             |                        |
|            | rat GAPDH | 14.983 |         |             |                        |
|            | rat GAPDH | 14.962 |         |             |                        |
| 5          | rat p38   | 26.446 | 26.416  | 10.603      | 6.431E-04              |
|            | rat p38   | 26.421 |         |             |                        |
|            | rat p38   | 26.382 |         |             |                        |
|            | rat GAPDH | 15.858 | 15.814  |             |                        |
|            | rat GAPDH | 15.770 |         |             |                        |
|            | rat GAPDH | 15.813 |         |             |                        |
| 10         | rat p38   | 26.535 | 26.484  | 10.946      | 5.069E-04              |
|            | rat p38   | 26.562 |         |             |                        |
|            | rat p38   | 26.354 |         |             |                        |
|            | rat GAPDH | 15.605 | 15.537  |             |                        |
|            | rat GAPDH | 15.495 |         |             |                        |
|            | rat GAPDH | 15.512 |         |             |                        |
| 15         | rat p38   | 26.269 | 26.281  | 11.626      | 3.165E-04              |
|            | rat p38   | 26.261 |         |             |                        |
|            | rat p38   | 26.313 |         |             |                        |
|            | rat GAPDH | 14.689 | 14.655  |             |                        |
|            | rat GAPDH | 14.650 |         |             |                        |
|            | rat GAPDH | 14.627 |         |             |                        |
| 20         | rat p38   | 28.453 | 28.460  | 13.762      | 7.201E-05              |
|            | rat p38   | 28.359 |         |             |                        |
|            | rat p38   | 28.568 |         |             |                        |
|            | rat GAPDH | 14.794 | 14.699  |             |                        |
|            | rat GAPDH | 14.637 |         |             |                        |
|            | rat GAPDH | 14.665 |         |             |                        |

**Table S1.** The original data of the gradient pre-experiment for p38 MAPK inhibitor SB203580 injection dosage. Each reaction was conducted in triplicate. All results were normalized to GAPDH. GAPDH, glyceraldehyde-3-phosphate dehydrogenase; CT, cycle threshold values;  $\Delta$ CT, gene Ct- $\beta$ -actin Ct.

Table S2

*The quality of the isolated RNA assessed by the 260/280 absorbance ratios*

| Sample No. | A260  | A280  | A260/280 | RNA Concentration(ug/mL) |
|------------|-------|-------|----------|--------------------------|
| C1         | 0.486 | 0.263 | 1.85     | 972.9                    |
| C2         | 0.497 | 0.270 | 1.84     | 993.5                    |
| C3         | 0.568 | 0.302 | 1.88     | 1136.7                   |
| C4         | 0.577 | 0.306 | 1.89     | 1153.9                   |
| C5         | 0.549 | 0.288 | 1.91     | 1098.5                   |
| C7         | 0.559 | 0.293 | 1.91     | 1118.7                   |
| C8         | 0.517 | 0.271 | 1.91     | 1033.4                   |
| C21        | 0.524 | 0.278 | 1.88     | 1047.8                   |
| C22        | 0.603 | 0.328 | 1.84     | 1206.5                   |
| C9         | 0.600 | 0.324 | 1.85     | 1199.3                   |
| C10        | 0.572 | 0.304 | 1.88     | 1143.2                   |
| C11        | 0.566 | 0.302 | 1.87     | 1133                     |
| C12        | 0.492 | 0.271 | 1.82     | 983.7                    |
| C13        | 0.527 | 0.288 | 1.83     | 1055                     |
| C14        | 0.521 | 0.285 | 1.83     | 1042.7                   |
| C15        | 0.493 | 0.272 | 1.81     | 985                      |
| C16        | 0.502 | 0.276 | 1.82     | 1003.7                   |
| C17        | 0.536 | 0.294 | 1.82     | 1071.4                   |
| C18        | 0.542 | 0.297 | 1.82     | 1084.4                   |
| C19        | 0.522 | 0.281 | 1.86     | 1044.7                   |
| C20        | 0.529 | 0.288 | 1.84     | 1058.5                   |
| C22        | 0.512 | 0.263 | 1.95     | 972.9                    |
| C23        | 0.512 | 0.268 | 1.91     | 993.5                    |
| C24        | 0.557 | 0.298 | 1.87     | 1128.6                   |
| C25        | 0.568 | 0.301 | 1.89     | 1137.8                   |
| C26        | 0.532 | 0.276 | 1.93     | 1017.3                   |
| C27        | 0.563 | 0.298 | 1.89     | 1034.5                   |
| C28        | 0.515 | 0.274 | 1.88     | 1038.2                   |
| C29        | 0.538 | 0.280 | 1.92     | 1059.9                   |
| C30        | 0.503 | 0.268 | 1.88     | 1169.3                   |
| C31        | 0.602 | 0.329 | 1.83     | 1136.2                   |
| C32        | 0.566 | 0.298 | 1.90     | 1076.3                   |
| C33        | 0.583 | 0.307 | 1.90     | 1164.2                   |
| C34        | 0.512 | 0.278 | 1.84     | 988.5                    |
| C35        | 0.532 | 0.281 | 1.89     | 1076.1                   |

|     |       |       |      |        |
|-----|-------|-------|------|--------|
| C36 | 0.545 | 0.292 | 1.87 | 1068.3 |
| C37 | 0.502 | 0.265 | 1.89 | 978.1  |
| C38 | 0.511 | 0.267 | 1.91 | 1063.6 |
| C39 | 0.563 | 0.297 | 1.90 | 1041.2 |
| C40 | 0.525 | 0.278 | 1.89 | 1089.4 |
| C41 | 0.532 | 0.284 | 1.87 | 1075.3 |
| C42 | 0.547 | 0.292 | 1.87 | 1095.5 |

**Table S2.** The 260/280 absorbance ratios falling within the range of 1.8 to 2.0 indicated that the RNA was free of contamination.

Table S3

*Main parameters of singleplex PCR performed on p38 and  $\beta$ -actin*

| Sample No. | Target Name        | Reporter | Ct Threshold | Baseline Start | Baseline End | Tm          |
|------------|--------------------|----------|--------------|----------------|--------------|-------------|
| C1         | rat P38            | SYBR     | 472.910875   | 1              | 37           | 79.32863617 |
| C1         | rat $\beta$ -actin | SYBR     | 472.910875   | 1              | 37           | 70.67072296 |
| C10        | rat P38            | SYBR     | 472.910875   | 1              | 37           | 77.39044952 |
| C10        | rat $\beta$ -actin | SYBR     | 472.910875   | 1              | 37           | 70.52627563 |
| C11        | rat P38            | SYBR     | 472.910875   | 3              | 37           | 69.63095093 |
| C11        | rat $\beta$ -actin | SYBR     | 472.910875   | 3              | 37           | 69.63095093 |
| C12        | rat P38            | SYBR     | 472.910875   | 1              | 37           | 67.0941925  |
| C12        | rat $\beta$ -actin | SYBR     | 472.910875   | 1              | 37           | 74.10758209 |
| C13        | rat P38            | SYBR     | 472.910875   | 1              | 37           | 70.67549896 |
| C13        | rat $\beta$ -actin | SYBR     | 472.910875   | 1              | 37           | 66.49730682 |
| C14        | rat P38            | SYBR     | 472.910875   | 1              | 37           | 82.46396637 |
| C14        | rat $\beta$ -actin | SYBR     | 472.910875   | 1              | 37           | 68.73562622 |
| C15        | rat P38            | SYBR     | 472.910875   | 3              | 37           | 71.86927032 |
| C15        | rat $\beta$ -actin | SYBR     | 472.910875   | 1              | 37           | 77.68888855 |
| C16        | rat P38            | SYBR     | 472.910875   | 3              | 37           | 73.21225739 |
| C16        | rat $\beta$ -actin | SYBR     | 472.910875   | 1              | 37           | 72.01848602 |
| C17        | rat P38            | SYBR     | 472.910875   | 1              | 37           | 65.75119781 |
| C17        | rat $\beta$ -actin | SYBR     | 472.910875   | 1              | 37           | 72.46615601 |
| C18        | rat P38            | SYBR     | 472.910875   | 1              | 37           | 75.30162048 |
| C18        | rat $\beta$ -actin | SYBR     | 472.910875   | 3              | 37           | 73.51081848 |
| C19        | rat P38            | SYBR     | 472.910875   | 1              | 37           | 80.67403412 |
| C19        | rat $\beta$ -actin | SYBR     | 472.910875   | 3              | 37           | 79.9278717  |
| C2         | rat P38            | SYBR     | 472.910875   | 3              | 37           | 65.74466705 |
| C2         | rat $\beta$ -actin | SYBR     | 472.910875   | 3              | 37           | 66.64031219 |
| C20        | rat P38            | SYBR     | 472.910875   | 1              | 37           | 65.45220184 |
| C20        | rat $\beta$ -actin | SYBR     | 472.910875   | 1              | 37           | 80.82327271 |
| C21        | rat P38            | SYBR     | 472.910875   | 1              | 37           | 66.34760284 |
| C21        | rat $\beta$ -actin | SYBR     | 472.910875   | 1              | 37           | 73.80928802 |
| C22        | rat P38            | SYBR     | 472.910875   | 3              | 37           | 69.03380585 |
| C22        | rat $\beta$ -actin | SYBR     | 472.910875   | 1              | 37           | 76.79396057 |
| C3         | rat P38            | SYBR     | 472.910875   | 1              | 37           | 77.68662262 |
| C3         | rat $\beta$ -actin | SYBR     | 472.910875   | 3              | 37           | 78.13444519 |
| C4         | rat P38            | SYBR     | 472.910875   | 1              | 37           | 66.34176636 |
| C4         | rat $\beta$ -actin | SYBR     | 472.910875   | 1              | 37           | 71.11854553 |
| C5         | rat P38            | SYBR     | 472.910875   | 1              | 37           | 77.53734589 |
| C5         | rat $\beta$ -actin | SYBR     | 472.910875   | 3              | 37           | 67.98378754 |
| C7         | rat P38            | SYBR     | 472.910875   | 1              | 37           | 90.22566986 |
| C7         | rat $\beta$ -actin | SYBR     | 472.910875   | 1              | 37           | 71.26782227 |
| C8         | rat P38            | SYBR     | 472.910875   | 3              | 37           | 71.71564484 |

|     |                    |      |            |   |    |             |
|-----|--------------------|------|------------|---|----|-------------|
| C8  | rat $\beta$ -actin | SYBR | 472.910875 | 1 | 37 | 78.58226776 |
| C9  | rat P38            | SYBR | 472.910875 | 1 | 37 | 66.49104309 |
| C9  | rat $\beta$ -actin | SYBR | 472.910875 | 1 | 37 | 71.26782227 |
| C31 | rat P38            | SYBR | 472.910875 | 1 | 37 | 67.94058882 |
| C31 | rat $\beta$ -actin | SYBR | 472.910875 | 3 | 37 | 68.11938588 |
| C32 | rat P38            | SYBR | 472.910875 | 1 | 37 | 72.00937478 |
| C32 | rat $\beta$ -actin | SYBR | 472.910875 | 1 | 37 | 81.11093757 |
| C33 | rat P38            | SYBR | 472.910875 | 1 | 37 | 66.29845869 |
| C33 | rat $\beta$ -actin | SYBR | 472.910875 | 1 | 37 | 70.83729477 |
| C34 | rat P38            | SYBR | 472.910875 | 1 | 37 | 83.42857468 |
| C34 | rat $\beta$ -actin | SYBR | 472.910875 | 1 | 37 | 69.18836547 |
| C35 | rat P38            | SYBR | 472.910875 | 3 | 37 | 69.38927648 |
| C35 | rat $\beta$ -actin | SYBR | 472.910875 | 1 | 37 | 75.29840006 |
| C36 | rat P38            | SYBR | 472.910875 | 3 | 37 | 72.38761938 |
| C36 | rat $\beta$ -actin | SYBR | 472.910875 | 1 | 37 | 74.48820585 |
| C37 | rat P38            | SYBR | 472.910875 | 1 | 37 | 67.58903726 |
| C37 | rat $\beta$ -actin | SYBR | 472.910875 | 1 | 37 | 73.28593019 |
| C38 | rat P38            | SYBR | 472.910875 | 1 | 37 | 72.1874619  |
| C38 | rat $\beta$ -actin | SYBR | 472.910875 | 3 | 37 | 78.39856101 |
| C39 | rat P38            | SYBR | 472.910875 | 1 | 37 | 81.26153341 |
| C39 | rat $\beta$ -actin | SYBR | 472.910875 | 3 | 37 | 84.93756256 |
| C23 | rat P38            | SYBR | 472.910875 | 1 | 37 | 69.22784669 |
| C23 | rat $\beta$ -actin | SYBR | 472.910875 | 1 | 37 | 76.27583658 |
| C40 | rat P38            | SYBR | 472.910875 | 1 | 37 | 68.38662861 |
| C40 | rat $\beta$ -actin | SYBR | 472.910875 | 1 | 37 | 83.2749178  |
| C41 | rat P38            | SYBR | 472.910875 | 1 | 37 | 69.37597149 |
| C41 | rat $\beta$ -actin | SYBR | 472.910875 | 1 | 37 | 76.82664917 |
| C42 | rat P38            | SYBR | 472.910875 | 3 | 37 | 67.13756947 |
| C42 | rat $\beta$ -actin | SYBR | 472.910875 | 1 | 37 | 78.47193765 |
| C24 | rat P38            | SYBR | 472.910875 | 1 | 37 | 79.68661262 |
| C24 | rat $\beta$ -actin | SYBR | 472.910875 | 3 | 37 | 72.27186638 |
| C25 | rat P38            | SYBR | 472.910875 | 1 | 37 | 70.38745535 |
| C25 | rat $\beta$ -actin | SYBR | 472.910875 | 1 | 37 | 85.83224766 |
| C26 | rat P38            | SYBR | 472.910875 | 1 | 37 | 76.48188985 |
| C26 | rat $\beta$ -actin | SYBR | 472.910875 | 3 | 37 | 83.948574   |
| C27 | rat P38            | SYBR | 472.910875 | 1 | 37 | 89.26336476 |
| C27 | rat $\beta$ -actin | SYBR | 472.910875 | 1 | 37 | 72.31150649 |
| C28 | rat P38            | SYBR | 472.910875 | 1 | 37 | 74.31829949 |
| C28 | rat $\beta$ -actin | SYBR | 472.910875 | 1 | 37 | 79.85938299 |
| C29 | rat P38            | SYBR | 472.910875 | 1 | 37 | 68.39857739 |
| C29 | rat $\beta$ -actin | SYBR | 472.910875 | 1 | 37 | 67.2172839  |

**Table S3.** By detecting DNA expression of p38 and  $\beta$ -actin, the samples were assured of not being contaminated with genomic DNA. Tm, melting temperature.
